# Supplementary material for: Habitual tea consumption is associated with a lower prevalence of kidney stone disease in postmenopausal women
Source: PeerJ journal article supplement (doi:10.7717/peerj.18639), 2024-12-11
Supplement: codebook.docx [file codebook.docx]

**Codebook for the Raw Data on the association between tea consumption and renal stone in postmenopausal women**

In the raw dataset, certain columns are labeled with a ".x " or ".y " suffix. This differentiation arises from the presence of two questionnaires in the Taiwan Biobank (TWB) data. For this study, we utilized data from the ".y " columns, which correspond to the second questionnaire, as the ".x " columns from the first questionnaire did not include information on tea consumption habits and were therefore unsuitable for our analysis. The second questionnaire provides comprehensive data on tea consumption, menopausal status, and kidney stone disease, making it more appropriate for addressing the objectives of this study.
